# Supplementary material for: Growth evolution and phase transition from chalcocite to digenite in nanocrystalline copper sulfide: Morphological, optical and electrical properties
Source: publisher site journal article supplement (doi:10.3762/bjnano.5.166), 2014-09-15
Supplement: Additional file 1 [file 2190-4286-5-166-S1.pdf]

## Supporting Information

for

### **Growth evolution and phase transition from chalcocite to digenite in nanocrystalline copper sulfide: Morphological, optical and electrical properties**

Priscilla Vasthi Quintana-Ramirez<sup>1</sup>, Ma. Concepción Arenas-Arrocena<sup>\*2,§</sup>, José Santos-Cruz<sup>3</sup>, Marina Vega-González<sup>4</sup>, Omar Martínez-Alvarez<sup>5</sup>, Víctor Manuel Castaño-Meneses<sup>6</sup>, Laura Susana Acosta-Torres<sup>2</sup> and Javier de la Fuente-Hernández<sup>2</sup>

Address: <sup>1</sup>Posgrado en Ciencia e Ingeniería de Materiales, Centro de Física Aplicada y Tecnología Avanzada, Universidad Nacional Autónoma de México, 76230, Querétaro, México; <sup>2</sup>Escuela Nacional de Estudios Superiores Unidad León, UNAM, Boulevard UNAM No. 2011 Predio el Saucillo y el Potrero, 36969, León Guanajuato, México; <sup>3</sup>Facultad de Química, Materiales Universidad Autónoma de Querétaro, 76010, Querétaro, México; <sup>4</sup>Centro de Geociencias, UNAM, 76230, Querétaro, México; <sup>5</sup>Departamento de Ingeniería en Energía, Universidad Politécnica de Guanajuato, 38483, Guanajuato, México and <sup>6</sup>Departamento de Ingeniería Molecular de Materiales, CFATA, UNAM, 76230, Querétaro, México.

Email: Ma. Concepción Arenas Arrocena\* - [carenas@enes.unam.mx](mailto:carenas@enes.unam.mx)

\*Corresponding author

§Phone: + 52 - 477 1943418

### **Additional Figures**

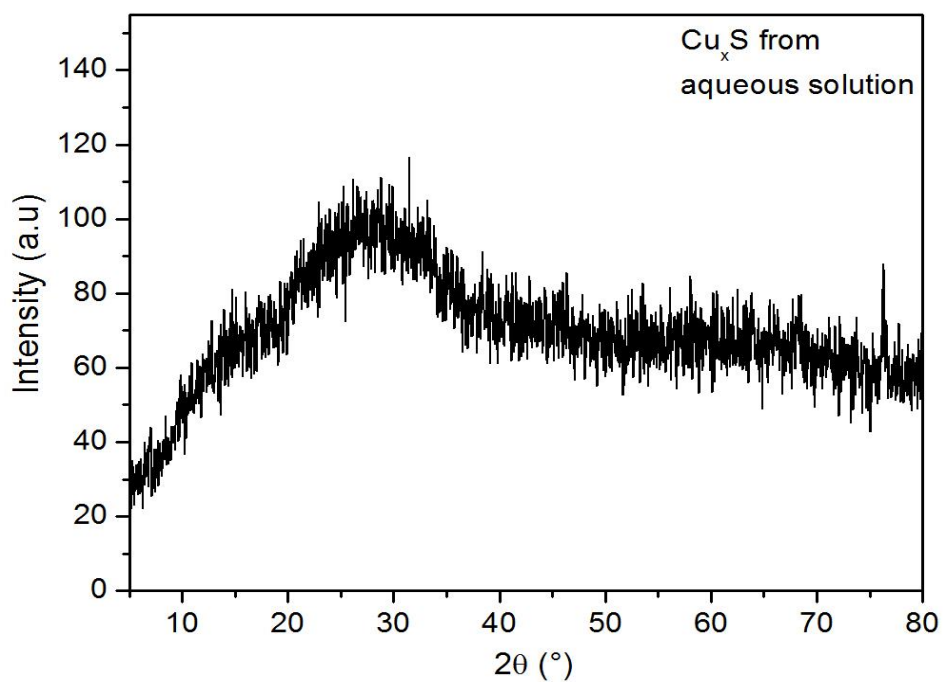

**Figure S1:** X-ray diffraction of copper sulfide obtained from aqueous solution.

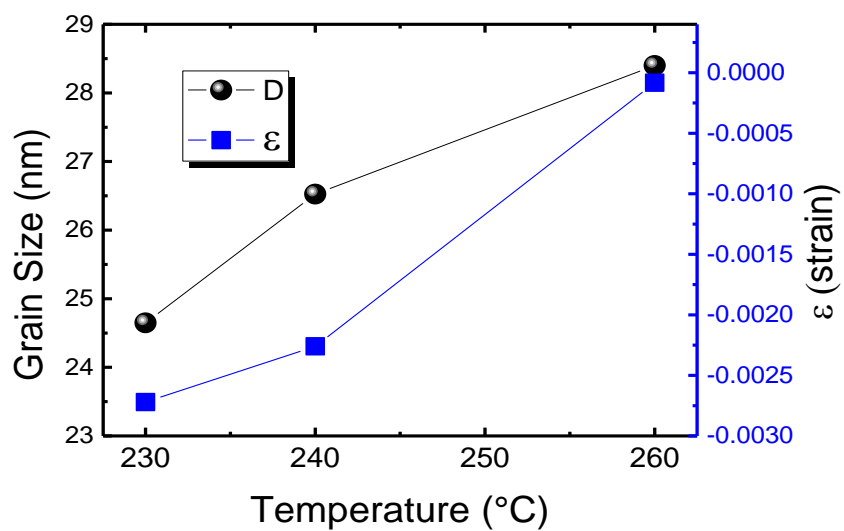

**Figure S2:** Grain size and strain the copper sulfide samples in organic solution.

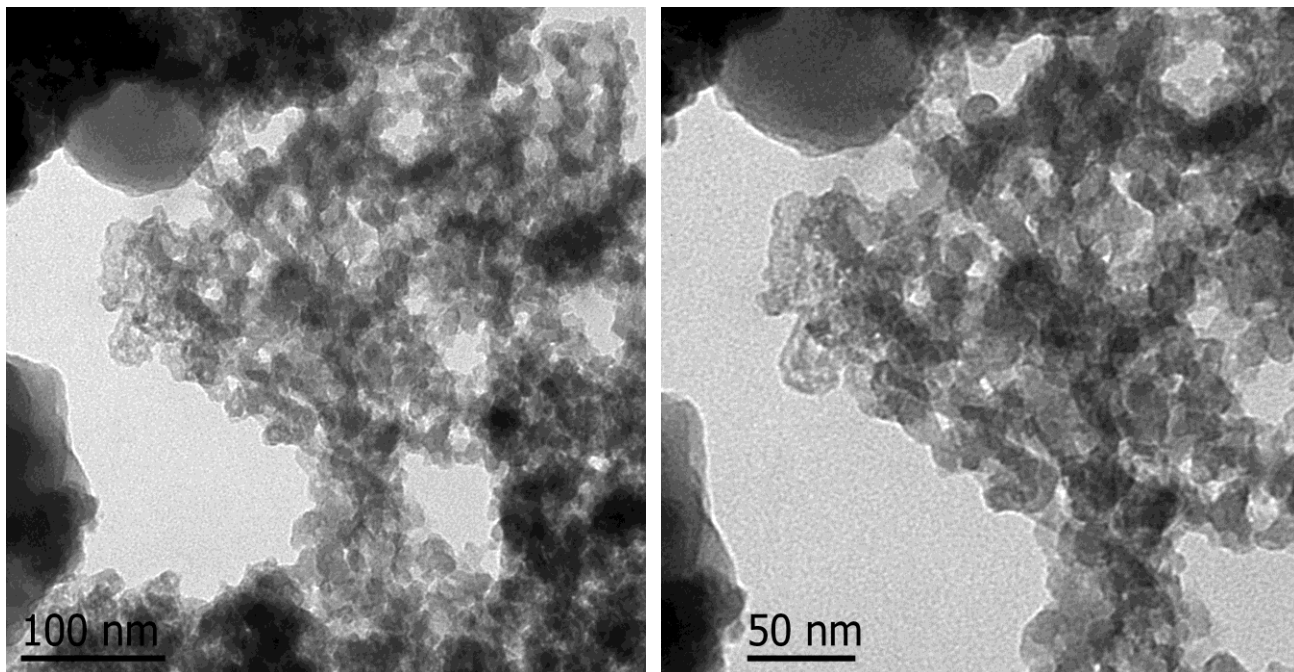

**Figure S3:** TEM images of amorphous copper sulfide prepared in aqueous solution.

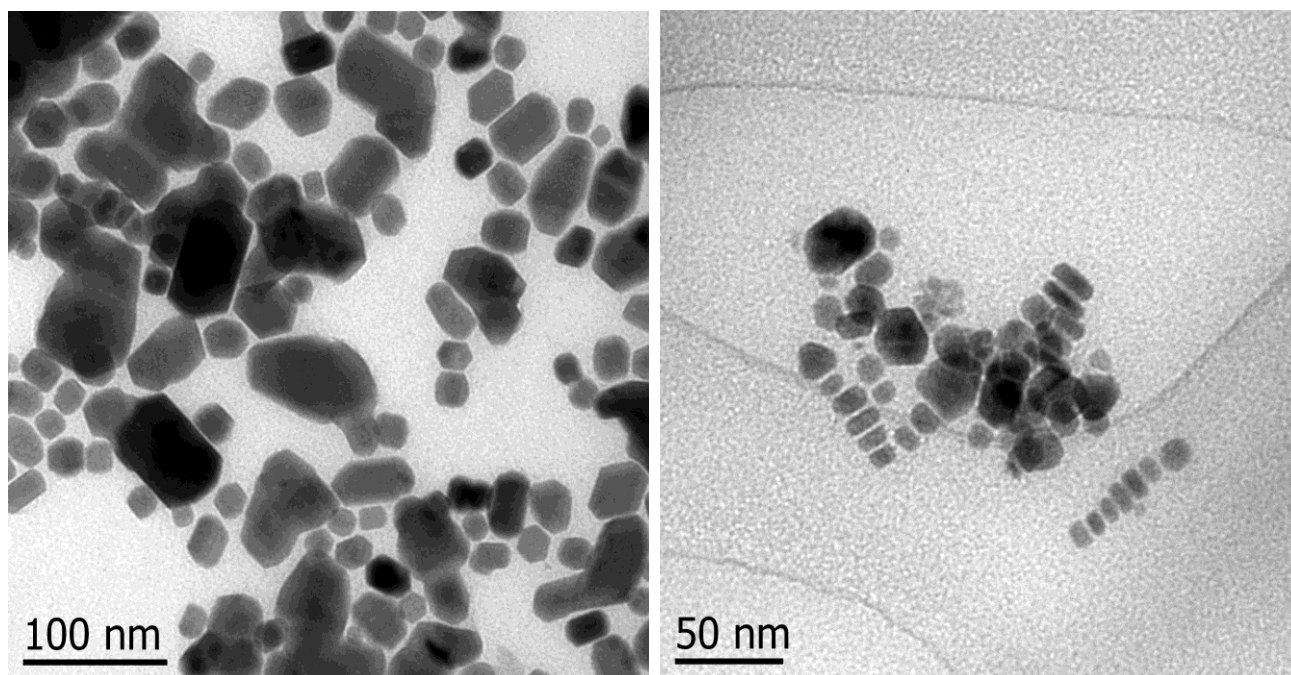

**Figure S4:** TEM images of copper sulfide prepared in organic solution at 260 °C.

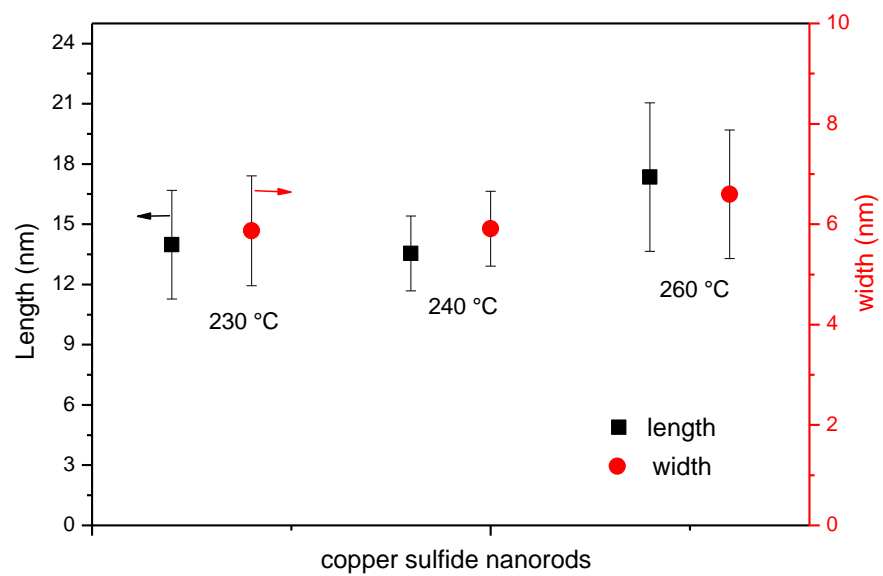

**Figure S5:** Size distribution of the  $\text{Cu}_x\text{S}$  nanorods observed TEM images.
